# Supplementary material
Source: MDPI journal article supplement (https://www.mdpi.com/2673-8449/4/2/12)
Supplement: s1 [file s1]

**Table S1. Clinical Application of JAK inhibitors in Inflammatory Bowel Diseases and related conditions.**

| JAK inhibitor | Approved indications                                                                                                                                      | Potential applications                                                                                                                                                                                                                                 |
|---------------|-----------------------------------------------------------------------------------------------------------------------------------------------------------|--------------------------------------------------------------------------------------------------------------------------------------------------------------------------------------------------------------------------------------------------------|
| Tofacitinib   | FDA, Australia and EMA approved for treatment of moderate to severe ulcerative colitis (UC)                                                               | As salvage therapy for Acute Severe Ulcerative Colitis (ASUC); As part of a combination therapy for refractory inflammatory bowel disease (IBD); Treatment for ankylosing spondylitis, peripheral arthritis and limited reports on benefits on uveitis |
| Upadacitinib  | FDA and EMA approved for treatment of moderate to severe ulcerative colitis (UC)<br>FDA approved for treatment of moderate to severe Crohn's disease (CD) | As salvage therapy for Acute Severe Ulcerative Colitis (ASUC); Treatment for fistulizing Crohn's disease; Reduction of extraintestinal manifestations i.e. anemia, peripheral and axial neuropathy                                                     |
| Filgotinib    | Treatment of moderate to severe ulcerative colitis (UC) in the UK, EU and Japan                                                                           | Treatment of fistulizing perianal Crohn's disease                                                                                                                                                                                                      |
