# Supplementary material
Source: MDPI journal article supplement (https://www.mdpi.com/2673-8449/4/2/12)
Supplement: s1 [file s1]

Archive with 1 entries (1 files):
- biologics-2895798-supplementary.pdf
